# Supplementary material for: Influence of cholinium-based ionic liquids on the structural stability and activity of α-chymotrypsin
Source: Royal Society of Chemistry journal article supplement (doi:10.1039/c7nj03023a), 2017-01-01
Supplement: c7nj03023a1.pdf [file c7nj03023a1.pdf]

### Electronic Supplementary Information

#### Influence of cholinium-based ionic liquids on the structural stability and activity of $\alpha$ -chymotrypsin

Meena Bisht and Pannuru Venkatesu\*

Department of Chemistry, University of Delhi, Delhi-110 007, India

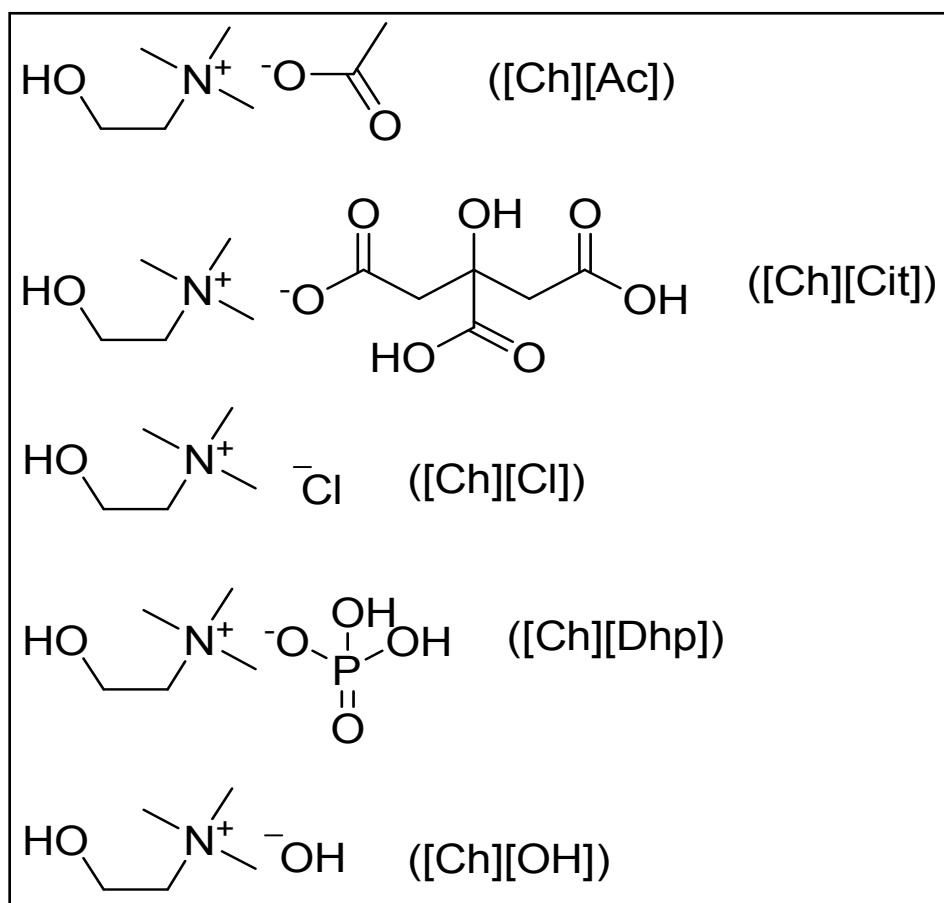

**Figure S1.** Chemical structures of choline (C<sub>5</sub>H<sub>14</sub>NO<sup>+</sup>) based ILs.

**Table S1 Hydrodynamic diameter ( $d_H$ ) of CT in the presence of various concentrations of ILs.**

| Concentration<br>of ILs (M) | Hydrodynamic diameter ( $d_H$ )/(nm) of CT in ILs |           |          |           |          |
|-----------------------------|---------------------------------------------------|-----------|----------|-----------|----------|
|                             | [Ch][Ac]                                          | [Ch][Cit] | [Ch][Cl] | [Ch][Dhp] | [Ch][OH] |
| 0.0                         | 4.50                                              | 4.50      | 4.50     | 4.50      | 4.50     |
| 0.05                        | 4.16                                              | 4.65      | 4.22     | 4.40      | 5.22     |
| 0.1                         | 4.06                                              | 5.00      | 4.03     | 4.51      | 5.91     |
| 0.2                         | 3.89                                              | 5.44      | 4.49     | 4.80      | 6.12     |
| 0.5                         | 4.15                                              | 5.89      | 4.52     | 5.19      | 168      |
| 1.0                         | 4.58                                              | 6.89      | 4.71     | 5.70      | 183      |
| 1.5                         | 6.20                                              | 9.41      | 5.05     | 6.20      | 213      |
